# Supplementary material for: Self-assembly, crystal structures, and properties of metal-2-sulfoterephthalate frameworks based on [M4(μ3-OH)2]6+ clusters (M = Co, Mn, Zn and Cd)
Source: Royal Society of Chemistry journal article supplement (doi:10.1039/c2dt11532h), 2012-01-01
Supplement: c2dt11532h.pdf [file c2dt11532h.pdf]

## Supporting Information

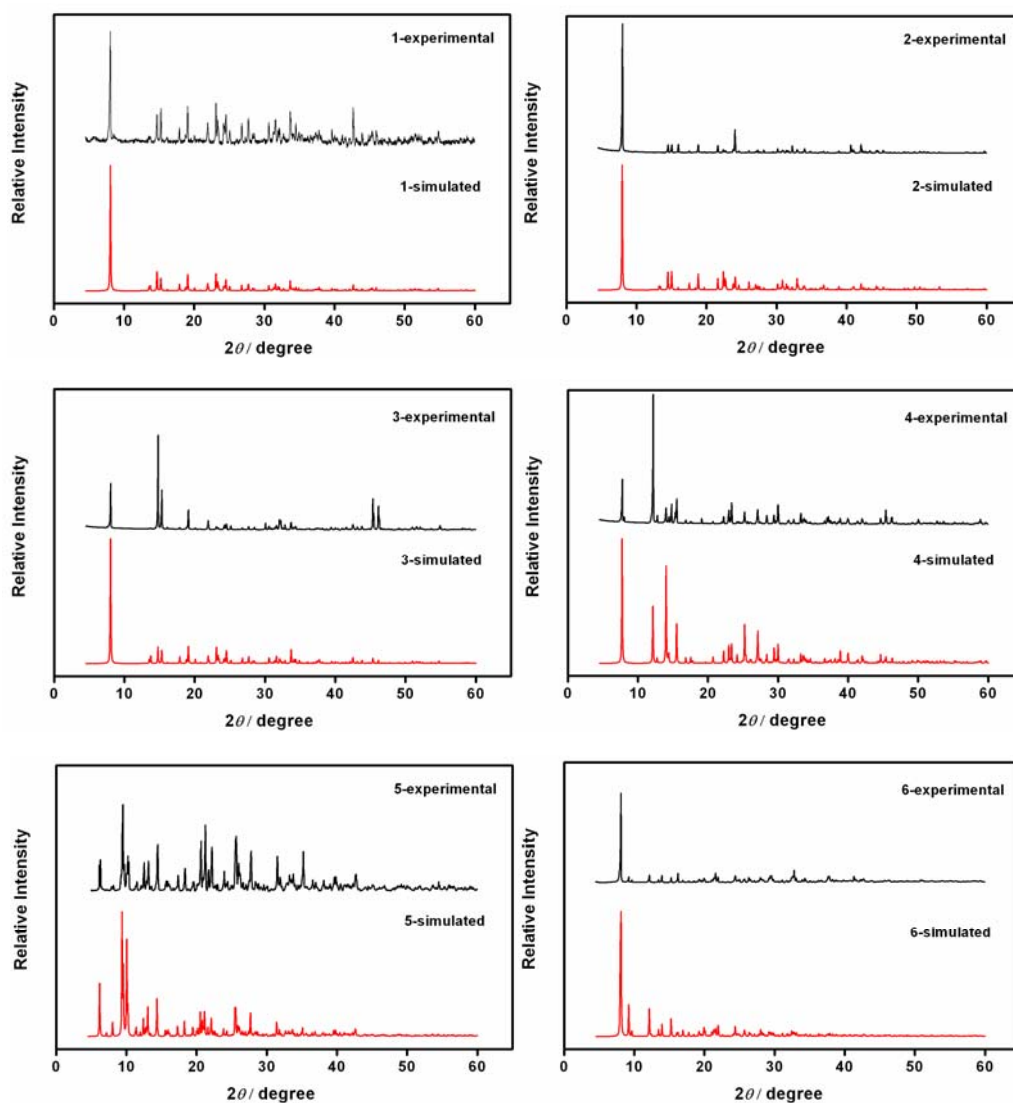

**Fig. S1** The PXRD patterns for complexes 1-6. Red line-simulated and black line-experimental.

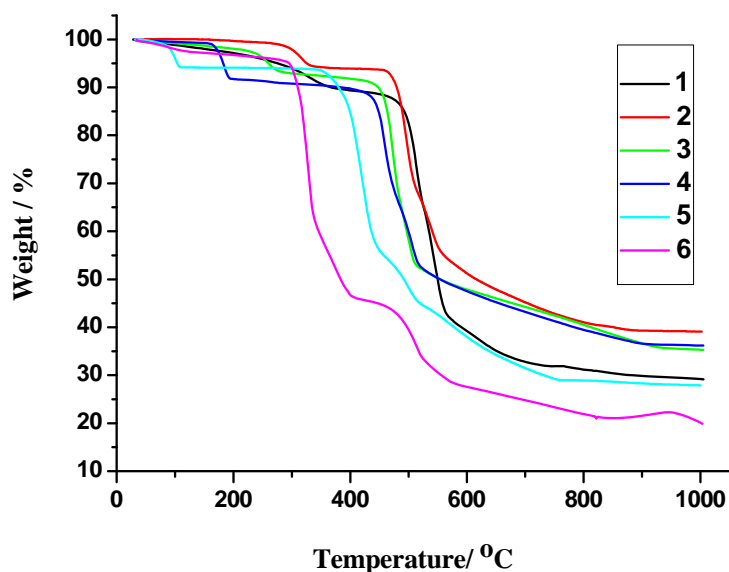

**Fig. S2** The TG curves of complexes 1-6.

**Table S1** Selected bond lengths (Å) and angles (°) for complex 1

|                      |            |                      |            |
|----------------------|------------|----------------------|------------|
| Co(1)-O(7)           | 1.9937(15) | Co(2)-O(10)          | 2.1251(14) |
| Co(1)-O(3)#1         | 2.0652(14) | Co(2)-O(8)#4         | 2.0238(15) |
| Co(1)-O(5)#2         | 2.0569(14) | Co(2)-O(2)#5         | 2.1204(15) |
| Co(1)-O(6)#1         | 2.0098(14) | Co(2)-O(6)           | 2.1900(15) |
| Co(1)-O(10)#1        | 2.1436(13) | Co(2)-O(6)#3         | 2.0169(14) |
| Co(2)-O(9)           | 2.1423(16) | O(6)#3-Co(2)-O(2)#5  | 110.73(6)  |
| O(6)#1-Co(1)-O(5)#2  | 99.57(6)   | O(7)-Co(1)-O(6)#1    | 102.62(6)  |
| O(7)-Co(1)-O(3)#1    | 106.01(6)  | O(6)#1-Co(1)-O(3)#1  | 149.69(6)  |
| O(7)-Co(1)-O(10)#1   | 91.91(6)   | O(6)#1-Co(1)-O(10)#1 | 81.51(6)   |
| O(3)#1-Co(1)-O(10)#1 | 87.77(6)   | O(6)#3-Co(2)-O(8)#4  | 95.98(6)   |
| O(8)#4-Co(2)-O(2)#5  | 93.29(6)   | O(6)#3-Co(2)-O(10)   | 89.65(6)   |
| O(2)#5-Co(2)-O(10)   | 87.15(6)   | O(6)#3-Co(2)-O(9)    | 161.36(6)  |
| O(2)#5-Co(2)-O(9)    | 86.07(6)   | O(10)-Co(2)-O(9)     | 82.96(6)   |
| O(8)#4-Co(2)-O(6)    | 99.94(6)   | O(2)#5-Co(2)-O(6)    | 158.57(6)  |
| O(9)-Co(2)-O(6)      | 77.00(6)   | O(8)#4-Co(2)-O(9)    | 90.89(6)   |
| O(7)-Co(1)-O(5)#2    | 102.03(6)  | O(6)#3-Co(2)-O(6)    | 84.73(6)   |
| O(5)#2-Co(1)-O(3)#1  | 84.10(6)   | O(10)-Co(2)-O(6)     | 77.90(5)   |
| O(5)#2-Co(1)-O(10)#1 | 165.36(6)  | O(8)#4-Co(2)-O(10)   | 173.79(6)  |

Symmetry codes: #1:  $-0.5+x, y, 0.5-z$ ; #2:  $1-x, 0.5+y, 0.5-z$ ; #3:  $2-x, -y, 1-z$ ;

#4:  $1.5-x, -y, 0.5+z$ ; #5:  $1-x, -y, 1-z$

**Table S2** Selected bond lengths (Å) and angles (°) for complex **2**

|                     |           |                     |           |
|---------------------|-----------|---------------------|-----------|
| Mn(1)-O(8)          | 2.086(2)  | Mn(2)-O(5)#3        | 2.074(2)  |
| Mn(1)-O(4)#1        | 2.087(2)  | Mn(2)-O(8)#4        | 2.103(2)  |
| Mn(1)-O(6)#2        | 2.101(2)  | Mn(2)-O(3)#5        | 2.186(2)  |
| Mn(1)-O(1)          | 2.166(2)  | Mn(2)-O(7)          | 2.232(2)  |
| Mn(1)-O(7)          | 2.208(2)  | Mn(2)-O(9)          | 2.260(2)  |
| O(8)-Mn(1)-O(4)#1   | 103.54(9) | Mn(2)-O(8)          | 2.268(2)  |
| O(8)-Mn(1)-O(6)#2   | 101.83(9) | O(5)#3-Mn(2)-O(8)#4 | 95.47(9)  |
| O(4)#1-Mn(1)-O(6)#2 | 99.67(9)  | O(5)#3-Mn(2)-O(3)#5 | 94.11(9)  |
| O(8)-Mn(1)-O(1)     | 148.34(9) | O(8)#4-Mn(2)-O(3)#5 | 113.34(9) |
| O(4)#1-Mn(1)-O(1)   | 105.73(9) | O(5)#3-Mn(2)-O(7)   | 172.95(9) |
| O(6)#2-Mn(1)-O(1)   | 84.97(8)  | O(8)#4-Mn(2)-O(7)   | 90.35(8)  |
| O(8)-Mn(1)-O(7)     | 81.67(8)  | O(3)#5-Mn(2)-O(7)   | 87.20(8)  |
| O(4)#1-Mn(1)-O(7)   | 92.10(9)  | O(5)#3-Mn(2)-O(9)   | 93.63(10) |
| O(6)#2-Mn(1)-O(7)   | 166.46(9) | O(8)#4-Mn(2)-O(9)   | 158.06(9) |
| O(1)-Mn(1)-O(7)     | 85.42(8)  | O(3)#5-Mn(2)-O(9)   | 85.79(9)  |
| O(3)#5-Mn(2)-O(8)   | 157.29(8) | O(7)-Mn(2)-O(9)     | 79.55(9)  |
| O(7)-Mn(2)-O(8)     | 77.25(8)  | O(5)#3-Mn(2)-O(8)   | 99.41(9)  |
| O(9)-Mn(2)-O(8)     | 75.27(8)  | O(8)#4-Mn(2)-O(8)   | 83.56(9)  |

Symmetry codes: #1:  $x-0.5, y, -z+1.5$ ; #2:  $-x+1.5, y+1, z$ ; #3:  $-x+1.5, -y, z+1.5$ ;  
#4:  $-x+1, -y, -z+2$ ; #5:  $-x+2, -y, -z+2$ .

**Table S3** Selected bond lengths (Å) and angles (°) for complex **3**

|                     |            |                     |            |
|---------------------|------------|---------------------|------------|
| Zn(1)-O(2)#4        | 2.044(2)   | Zn(2)-O(8)          | 1.998(2)   |
| Zn(1)-O(5)          | 2.0850(19) | Zn(2)-O(9)          | 2.125(2)   |
| Zn(1)-O(8)#2        | 1.979(2)   | Zn(2)-O(3)#5        | 2.0082(19) |
| Zn(2)-O(6)#1        | 2.1297(19) | Zn(2)-O(8)#2        | 2.228(2)   |
| Zn(1)-O(1)          | 2.1583(19) | Zn(2)-O(1)          | 2.1525(18) |
| Zn(1)-O(4)#3        | 1.9748(18) |                     |            |
| O(4)#3-Zn(1)-O(8)#2 | 105.97(8)  | O(4)#3-Zn(1)-O(5)   | 106.12(8)  |
| O(4)#3-Zn(1)-O(2)#4 | 103.26(8)  | O(8)#2-Zn(1)-O(5)   | 146.30(8)  |
| O(8)#2-Zn(1)-O(2)#3 | 99.76(8)   | O(2)#3-Zn(1)-O(5)   | 82.63(8)   |
| O(5)-Zn(1)-O(1)     | 86.31(8)   | O(1)-Zn(1)-Zn(2)    | 43.48(5)   |
| O(4)#3-Zn(1)-Zn(2)  | 122.43(6)  | O(8)-Zn(2)-O(3)#5   | 96.56(8)   |
| O(8)#2-Zn(1)-Zn(2)  | 45.21(6)   | O(8)-Zn(2)-O(9)     | 160.64(8)  |
| O(2)#4-Zn(1)-Zn(2)  | 126.57(5)  | O(3)#5-Zn(2)-O(9)   | 90.49(8)   |
| O(5)-Zn(1)-Zn(2)    | 106.96(6)  | O(8)-Zn(2)-O(6)#1   | 111.89(8)  |
| O(6)#1-Zn(2)-O(1)   | 86.66(7)   | O(3)#5-Zn(2)-O(8)#2 | 102.08(8)  |
| O(8)-Zn(2)-O(8)#2   | 84.02(9)   | O(9)-Zn(2)-O(8)#2   | 76.87(8)   |
| O(4)#3-Zn(1)-O(1)   | 94.34(8)   | O(8)-Zn(2)-O(1)     | 89.62(7)   |
| O(8)#2-Zn(1)-O(1)   | 81.28(8)   | O(3)#5-Zn(2)-O(1)   | 173.34(8)  |
| O(2)#3-Zn(1)-O(1)   | 161.24(7)  | O(9)-Zn(2)-O(1)     | 82.86(8)   |
| O(3)#5-Zn(2)-O(6)#1 | 93.32(8)   | O(6)#1-Zn(2)-O(8)#2 | 156.58(7)  |
| O(9)-Zn(2)-O(6)#1   | 85.56(8)   | O(1)-Zn(2)-O(8)#2   | 76.01(7)   |

Symmetry codes: #1: 1-x, -y, 2-z; #2: 2-x, -y, 2-z; #3: 0.5+x, y, 1.5-z; #4: 1.5-x, 0.5+y, z; #5: 1.5-x, -y, 0.5+z.

**Table S4** Selected bond lengths (Å) and angles (°) for complex **4**

|                      |            |                      |            |
|----------------------|------------|----------------------|------------|
| Zn(1)-O(1)           | 2.064(3)   | Zn(2)-O(2)           | 1.941(3)   |
| Zn(1)-O(9)           | 2.108(3)   | Zn(2)-O(3)#3         | 1.951(3)   |
| Zn(1)-O(4)#2         | 2.066(3)   | Zn(2)-O(9)           | 1.960(3)   |
| Zn(1)-O(9)#1         | 2.077(3)   | Zn(2)-O(8)           | 2.020(3)   |
| Zn(1)-O(10)          | 2.072(3)   | Zn(1)-O(6)#2         | 2.168(3)   |
| O(1)-Zn(1)-O(4)#2    | 89.30(13)  | O(1)-Zn(1)-O(10)     | 84.99(12)  |
| O(1)-Zn(1)-O(9)#1    | 176.08(12) | O(4)#2-Zn(1)-O(9)    | 168.97(12) |
| O(4)#2-Zn(1)-O(9)#1  | 93.19(12)  | O(10)-Zn(1)-O(9)     | 100.89(12) |
| O(10)-Zn(1)-O(9)#1   | 98.03(12)  | O(9)#1-Zn(1)-O(9)    | 84.14(12)  |
| O(1)-Zn(1)-O(9)      | 92.86(12)  | O(1)-Zn(1)-O(6)#2    | 90.85(12)  |
| O(1)-Zn(1)-Zn(1)#1   | 134.49(9)  | O(9)-Zn(1)-Zn(1)#1   | 41.69(8)   |
| O(4)#2-Zn(1)-Zn(1)#1 | 134.68(9)  | O(6)#2-Zn(1)-Zn(1)#1 | 78.37(8)   |
| O(10)-Zn(1)-Zn(1)#1  | 102.80(9)  | O(1)-Zn(1)-Zn(2)     | 67.52(9)   |
| O(9)#1-Zn(1)-Zn(1)#1 | 42.45(8)   | O(4)#2-Zn(1)-Zn(2)   | 135.17(9)  |
| Zn(1)#1-Zn(1)-Zn(2)  | 71.14(2)   | O(2)-Zn(2)-O(3)#3    | 124.80(13) |
| O(3)#3-Zn(2)-O(9)    | 107.47(13) | O(9)-Zn(2)-O(8)      | 100.79(13) |
| O(2)-Zn(2)-O(8)      | 101.74(14) | O(2)-Zn(2)-Zn(1)     | 83.92(9)   |
| O(3)#3-Zn(2)-O(8)    | 98.63(13)  | O(3)#3-Zn(2)-Zn(1)   | 116.14(9)  |
| O(4)#2-Zn(1)-O(10)   | 90.07(12)  | O(10)-Zn(1)-Zn(2)    | 123.32(9)  |
| O(4)#2-Zn(1)-O(6)#2  | 92.39(12)  | O(9)#1-Zn(1)-Zn(2)   | 108.64(8)  |
| O(10)-Zn(1)-O(6)#2   | 175.14(12) | O(9)-Zn(1)-Zn(2)     | 37.69(8)   |
| O(9)#1-Zn(1)-O(6)#2  | 86.03(11)  | O(6)#2-Zn(1)-Zn(2)   | 52.41(8)   |
| O(9)-Zn(1)-O(6)#2    | 76.78(11)  | O(2)-Zn(2)-O(9)      | 117.99(13) |
| O(8)-Zn(2)-Zn(1)     | 133.21(9)  | O(9)-Zn(2)-Zn(1)     | 41.11(8)   |

Symmetry codes: #1:  $-x, -y, 1-z$ ; #2:  $-0.5+x, y, 0.5-z$ ; #3:  $-x, -0.5+y, 0.5-z$ .

**Table S5** Selected bond lengths (Å) and angles (°) for complex **5**

|                     |            |                      |            |
|---------------------|------------|----------------------|------------|
| Zn(1)-N(1)          | 2.002(2)   | Zn(3)-O(12)#2        | 1.957(2)   |
| Zn(1)-O(8)          | 1.9136(18) | Zn(3)-O(14)          | 1.956(2)   |
| Zn(1)-O(16)         | 1.941(2)   | Zn(3)-O(10)          | 1.943(2)   |
| Zn(1)-O(2)#1        | 1.934(2)   | Zn(3)-N(3)#3         | 2.038(2)   |
| Zn(2)-O(10)         | 2.2000(19) | Zn(4)-O(8)           | 2.1764(19) |
| Zn(2)-O(17)         | 2.1145(19) | Zn(4)-O(6)           | 2.016(2)   |
| Zn(2)-N(4)          | 2.129(2)   | Zn(4)-O(10)          | 2.073(2)   |
| Zn(2)-O(9)          | 2.1250(19) | Zn(4)-N(2)#3         | 2.111(2)   |
| Zn(2)-O(11)#2       | 2.062(2)   | Zn(4)-O(1)#2         | 2.021(2)   |
| Zn(2)-O(8)          | 2.064(2)   | N(4)-Zn(2)-O(10)     | 176.38(9)  |
| O(8)-Zn(1)-O(2)#1   | 108.90(9)  | O(8)-Zn(1)-O(16)     | 110.70(9)  |
| O(11)#2-Zn(2)-O(17) | 84.66(8)   | O(2)#2-Zn(1)-O(16)   | 103.58(10) |
| O(8)-Zn(2)-O(17)    | 90.00(8)   | O(8)-Zn(1)-N(1)      | 118.89(9)  |
| O(11)#2-Zn(2)-O(9)  | 87.79(8)   | O(8)-Zn(2)-N(4)      | 98.21(9)   |
| O(8)-Zn(2)-O(9)     | 96.92(8)   | O(17)-Zn(2)-N(4)     | 91.52(9)   |
| O(17)-Zn(2)-O(9)    | 171.92(9)  | O(9)-Zn(2)-N(4)      | 91.61(9)   |
| O(11)#2-Zn(2)-N(4)  | 91.97(9)   | O(11)#2-Zn(2)-O(10)  | 91.35(8)   |
| O(10)-Zn(3)-O(14)   | 116.66(9)  | O(14)-Zn(3)-N(3)#3   | 101.81(9)  |
| O(10)-Zn(3)-O(12)#2 | 104.26(9)  | O(12)#2-Zn(3)-N(3)#3 | 99.20(10)  |
| O(14)-Zn(3)-O(12)#2 | 115.36(10) | O(6)-Zn(4)-O(1)#1    | 101.59(9)  |
| O(10)-Zn(3)-N(3)#3  | 118.71(10) | O(6)-Zn(4)-O(10)     | 111.25(8)  |
| O(6)-Zn(4)-O(8)     | 87.78(8)   | O(1)#1-Zn(4)-O(8)    | 96.18(8)   |
| N(2)#3-Zn(4)-O(8)   | 171.89(9)  | O(2)#1-Zn(1)-N(1)    | 108.82(9)  |
| O(1)#1-Zn(4)-O(10)  | 146.47(9)  | O(16)-Zn(1)-N(1)     | 104.84(10) |
| O(6)-Zn(4)-N(2)#3   | 94.73(9)   | O(11)#2-Zn(2)-O(8)   | 168.63(8)  |
| O(1)#4-Zn(4)-N(2)#3 | 90.88(9)   | O(8)-Zn(2)-O(10)     | 78.61(7)   |
| O(10)-Zn(4)-N(2)#3  | 92.93(9)   | O(17)-Zn(2)-O(10)    | 90.22(8)   |
| O(10)-Zn(4)-O(8)    | 78.97(7)   | O(9)-Zn(2)-O(10)     | 87.08(8)   |

Symmetry codes: #1: x, 0.5-y, 0.5+z ; #2 :x, 1.5-y, -0.5+z; #3: 1+x, y, z.

**Table S6 Selected bond lengths (Å) and angles (°) for complex 6**

|                     |            |                     |            |
|---------------------|------------|---------------------|------------|
| Cd(1)-O(8)          | 2.219(2)   | Cd(2)-O(7)#1        | 2.276(2)   |
| Cd(1)-O(1)          | 2.379(2)   | Cd(2)-O(8)#2        | 2.254(2)   |
| Cd(1)-O(6)#1        | 2.289(2)   | Cd(2)-O(5)#2        | 2.379(2)   |
| Cd(1)-N(3)          | 2.317(3)   | Cd(2)-O(8)          | 2.318(2)   |
| Cd(1)-O(3)          | 2.328(2)   | Cd(2)-O(1)          | 2.319(2)   |
| Cd(1)-N(1)          | 2.331(3)   | Cd(2)-N(2)#3        | 2.310(3)   |
| O(8)-Cd(1)-N(1)     | 160.17(10) | O(8)-Cd(1)-O(1)     | 76.75(8)   |
| O(6)#1-Cd(1)-N(1)   | 89.85(10)  | O(6)#1-Cd(1)-O(1)   | 96.37(9)   |
| N(3)-Cd(1)-N(1)     | 95.85(12)  | N(3)-Cd(1)-O(1)     | 173.41(10) |
| O(3)-Cd(1)-N(1)     | 88.38(9)   | O(3)-Cd(1)-O(1)     | 87.29(8)   |
| O(3)-Cd(1)-Cd(2)    | 108.00(6)  | O(8)#2-Cd(2)-O(7)#1 | 169.84(9)  |
| N(1)-Cd(1)-Cd(2)    | 120.02(8)  | O(8)#2-Cd(2)-N(2)#3 | 99.35(10)  |
| O(1)-Cd(1)-Cd(2)    | 42.48(5)   | O(7)#1-Cd(2)-N(2)#3 | 85.18(10)  |
| O(8)#2-Cd(2)-O(1)   | 96.43(8)   | N(2)#3-Cd(2)-O(1)   | 106.34(10) |
| O(7)#1-Cd(2)-O(1)   | 90.94(9)   | O(8)-Cd(2)-O(1)     | 76.06(8)   |
| N(2)#3-Cd(2)-O(5)#2 | 92.95(10)  | O(8)-Cd(2)-O(5)#2   | 84.24(9)   |
| O(8)-Cd(1)-N(3)     | 103.86(11) | O(8)#2-Cd(2)-O(8)   | 82.89(9)   |
| O(6)#1-Cd(1)-N(3)   | 90.18(10)  | O(7)#1-Cd(2)-O(8)   | 92.17(8)   |
| O(8)-Cd(1)-O(6)#1   | 92.21(9)   | N(2)#3-Cd(2)-O(8)   | 176.42(9)  |
| N(3)-Cd(1)-O(3)     | 86.14(10)  | O(8)#2-Cd(2)-O(5)#2 | 90.21(8)   |
| O(8)-Cd(1)-O(3)     | 90.77(8)   | O(7)#1-Cd(2)-O(5)#2 | 80.44(9)   |
| O(6)#1-Cd(1)-O(3)   | 175.73(9)  | O(1)-Cd(2)-O(5)#2   | 158.20(9)  |
| N(1)-Cd(1)-O(1)     | 83.42(10)  | O(6)#1-Cd(1)-Cd(2)  | 76.24(6)   |
| O(8)-Cd(1)-Cd(2)    | 42.03(6)   | N(3)-Cd(1)-Cd(2)    | 141.03(9)  |

Symmetry codes:#1:0.5+x, 0.5-y,0.5+z ; #2: 1-x, -y, 1-z; #3: 1.5-x, -0.5+y, 0.5-z .
